# Supplementary material for: Recovery of Fluorinated Refrigerants from Decommissioned RAC Equipment in Germany—Implications for National Emission Reporting under the UNFCCC
Source: MDPI journal article supplement (doi:10.3390/atmos15010035), 2023-12-27
Supplement: s1 [file s1]

## Supplementary Materials

# Recovery of Fluorinated Refrigerants from Decommissioned RAC Equipment in Germany—Implications for National Emission Reporting under the UNFCCC

David Behringer, Kerstin Martens and Barbara Gschrey

**Table S1.** Number of decommissioned units filled with fluorinated refrigerants in the VDKF-LEC database for the different sectors and subsectors.

| Sector                                | Subsector             | Gas   | 2017 | 2018 | 2019 | 2020 | 2021 | Sum |
|---------------------------------------|-----------------------|-------|------|------|------|------|------|-----|
| 2.F.1.a Commer-<br>cial refrigeration | Compound sys-<br>tems | R134a | 27   | 39   | 43   | 26   | 43   | 178 |
|                                       |                       | R143a | 0    | 1    | 0    | 0    | 0    | 1   |
|                                       |                       | R401A | 0    | 3    | 0    | 3    | 0    | 6   |
|                                       |                       | R402A | 1    | 2    | 0    | 2    | 0    | 5   |
|                                       |                       | R403B | 0    | 1    | 0    | 0    | 0    | 1   |
|                                       |                       | R404A | 91   | 92   | 70   | 101  | 65   | 419 |
|                                       |                       | R407C | 20   | 15   | 11   | 3    | 18   | 67  |
|                                       |                       | R407F | 0    | 5    | 1    | 4    | 1    | 11  |
|                                       |                       | R409A | 1    | 0    | 0    | 0    | 0    | 1   |
|                                       |                       | R410A | 5    | 5    | 4    | 6    | 3    | 23  |
|                                       |                       | R413A | 1    | 5    | 1    | 1    | 0    | 8   |
|                                       |                       | R417A | 0    | 1    | 0    | 1    | 0    | 2   |
|                                       |                       | R422A | 2    | 1    | 0    | 0    | 0    | 3   |
|                                       |                       | R422D | 8    | 7    | 7    | 6    | 5    | 33  |
|                                       |                       | R437A | 0    | 0    | 0    | 1    | 0    | 1   |
|                                       |                       | R448A | 0    | 0    | 0    | 0    | 1    | 1   |
|                                       |                       | R449A | 0    | 3    | 4    | 12   | 7    | 26  |
|                                       |                       | R450A | 0    | 0    | 6    | 0    | 1    | 7   |
|                                       |                       | R452A | 0    | 1    | 0    | 2    | 2    | 5   |
|                                       |                       | R502  | 1    | 0    | 0    | 0    | 0    | 1   |
|                                       |                       | R504  | 1    | 0    | 0    | 0    | 0    | 1   |
|                                       |                       | R507A | 8    | 20   | 8    | 7    | 2    | 45  |
|                                       | Plug-in units         | R134a | 17   | 12   | 5    | 4    | 14   | 52  |
|                                       |                       | R401A | 0    | 0    | 0    | 2    | 0    | 2   |
|                                       |                       | R404A | 9    | 21   | 22   | 12   | 19   | 83  |
|                                       |                       | R407A | 0    | 1    | 0    | 0    | 0    | 1   |
|                                       |                       | R407C | 2    | 1    | 3    | 1    | 1    | 8   |
|                                       |                       | R409A | 10   | 0    | 1    | 0    | 0    | 11  |
|                                       |                       | R410A | 0    | 0    | 2    | 1    | 1    | 4   |
|                                       |                       | R413A | 0    | 1    | 0    | 0    | 1    | 2   |
|                                       |                       | R422D | 0    | 0    | 0    | 1    | 1    | 2   |
|                                       |                       | R448A | 0    | 0    | 2    | 0    | 0    | 2   |
|                                       |                       | R449A | 0    | 0    | 0    | 0    | 1    | 1   |
|                                       |                       | R507A | 1    | 1    | 0    | 0    | 0    | 2   |
| -                                     | R134a                 | 120   | 149  | 79   | 146  | 145  | 639  |     |

|                                     |                                      |       |     |     |     |     |     |      |
|-------------------------------------|--------------------------------------|-------|-----|-----|-----|-----|-----|------|
| 2.F.1.c Industrial refrigeration    |                                      | R143a | 0   | 0   | 0   | 1   | 0   | 1    |
|                                     |                                      | R23   | 0   | 1   | 7   | 4   | 3   | 15   |
|                                     |                                      | R402A | 0   | 0   | 2   | 0   | 0   | 2    |
|                                     |                                      | R404A | 22  | 19  | 16  | 30  | 19  | 106  |
|                                     |                                      | R407C | 40  | 58  | 35  | 34  | 50  | 217  |
|                                     |                                      | R407F | 0   | 1   | 0   | 0   | 3   | 4    |
|                                     |                                      | R410A | 4   | 9   | 7   | 8   | 6   | 34   |
|                                     |                                      | R417A | 2   | 0   | 0   | 2   | 1   | 5    |
|                                     |                                      | R422A | 0   | 0   | 0   | 1   | 1   | 2    |
|                                     |                                      | R422D | 12  | 3   | 4   | 4   | 11  | 34   |
|                                     |                                      | R448A | 0   | 1   | 0   | 1   | 0   | 2    |
|                                     |                                      | R449A | 0   | 0   | 0   | 2   | 1   | 3    |
|                                     |                                      | R452A | 0   | 0   | 0   | 1   | 2   | 3    |
|                                     |                                      | R507A | 4   | 5   | 7   | 7   | 1   | 24   |
| 2.F.1.f Stationary air-conditioning | Decentral split units (single/multi) | R134a | 35  | 44  | 30  | 45  | 25  | 179  |
|                                     |                                      | R23   | 0   | 0   | 0   | 0   | 1   | 1    |
|                                     |                                      | R32   | 0   | 2   | 5   | 8   | 7   | 22   |
|                                     |                                      | R404A | 3   | 4   | 2   | 2   | 8   | 19   |
|                                     |                                      | R407B | 0   | 1   | 0   | 0   | 0   | 1    |
|                                     |                                      | R407C | 147 | 186 | 167 | 117 | 86  | 703  |
|                                     |                                      | R407D | 0   | 0   | 0   | 0   | 1   | 1    |
|                                     |                                      | R407F | 1   | 0   | 0   | 0   | 1   | 2    |
|                                     |                                      | R410A | 290 | 396 | 388 | 361 | 357 | 1792 |
|                                     |                                      | R417A | 2   | 2   | 8   | 0   | 2   | 14   |
|                                     |                                      | R422D | 8   | 5   | 7   | 1   | 2   | 23   |
|                                     |                                      | R427A | 0   | 1   | 0   | 0   | 0   | 1    |
|                                     |                                      | R450A | 0   | 0   | 1   | 0   | 0   | 1    |
|                                     |                                      | R507A | 0   | 0   | 1   | 0   | 0   | 1    |
|                                     | Decentral VRF/VRV units              | R134a | 0   | 2   | 2   | 1   | 2   | 7    |
|                                     |                                      | R407C | 9   | 9   | 8   | 8   | 6   | 40   |
|                                     |                                      | R410A | 17  | 28  | 25  | 33  | 37  | 140  |
|                                     |                                      | R422D | 0   | 1   | 1   | 0   | 0   | 2    |
|                                     | Unspecified decentral units          | R407C | 14  | 8   | 6   | 4   | 4   | 36   |
|                                     |                                      | R410A | 7   | 10  | 5   | 4   | 4   | 30   |
|                                     | Central air handling units           | R134a | 1   | 2   | 1   | 3   | 4   | 11   |
|                                     |                                      | R404A | 2   | 1   | 0   | 2   | 0   | 5    |
|                                     |                                      | R407C | 17  | 18  | 19  | 20  | 14  | 88   |
|                                     |                                      | R410A | 12  | 11  | 9   | 15  | 9   | 56   |
|                                     |                                      | R417A | 1   | 0   | 1   | 0   | 0   | 2    |
|                                     |                                      | R422D | 2   | 1   | 4   | 1   | 0   | 8    |
|                                     |                                      | R513A | 0   | 0   | 1   | 0   | 0   | 1    |
|                                     | Unspecified central units            | R134a | 7   | 17  | 14  | 55  | 35  | 128  |
|                                     |                                      | R32   | 0   | 0   | 0   | 1   | 0   | 1    |
|                                     |                                      | R404A | 1   | 1   | 1   | 3   | 2   | 8    |
|                                     |                                      | R407C | 26  | 34  | 18  | 33  | 15  | 126  |
|                                     |                                      | R410A | 27  | 13  | 16  | 18  | 13  | 87   |
|                                     |                                      | R417A | 0   | 1   | 0   | 0   | 1   | 2    |
|                                     |                                      | R422D | 2   | 4   | 2   | 1   | 0   | 9    |
|                                     |                                      | R427A | 0   | 0   | 1   | 0   | 0   | 1    |

|                                 |       |      |      |      |      |      |      |
|---------------------------------|-------|------|------|------|------|------|------|
| Unspecified units               | R134a | 0    | 3    | 0    | 0    | 0    | 3    |
|                                 | R407C | 1    | 0    | 1    | 0    | 0    | 2    |
|                                 | R410A | 0    | 1    | 0    | 0    | 0    | 1    |
| Moveable units                  | R134a | 1    | 0    | 0    | 0    | 0    | 1    |
|                                 | R404A | 3    | 0    | 0    | 0    | 0    | 3    |
|                                 | R407C | 1    | 1    | 3    | 1    | 0    | 6    |
|                                 | R410A | 1    | 2    | 2    | 4    | 3    | 12   |
| Heat pumps (direct evaporation) | R134a | 0    | 1    | 1    | 2    | 1    | 5    |
|                                 | R32   | 0    | 0    | 0    | 1    | 0    | 1    |
|                                 | R407C | 1    | 1    | 0    | 0    | 2    | 4    |
|                                 | R410A | 4    | 4    | 12   | 2    | 5    | 27   |
|                                 | R422D | 1    | 1    | 0    | 0    | 0    | 2    |
| Heat pumps (multi-circuit)      | R134a | 2    | 5    | 1    | 3    | 1    | 12   |
|                                 | R407C | 0    | 1    | 0    | 1    | 3    | 5    |
|                                 | R410A | 1    | 2    | 0    | 3    | 2    | 8    |
| Total                           |       | 1056 | 1308 | 1110 | 1190 | 1082 | 5746 |

**Table S2.** Number of decommissioned units filled with fluorinated refrigerants in the VDKF-LEC dataset for the different sectors and subsectors. Shown is the dataset for the calculation of operating years.

| Sector                                 | Subsector                            | Refrigerant | 2017 | 2018 | 2019 | 2020 | 2021 | Sum  |
|----------------------------------------|--------------------------------------|-------------|------|------|------|------|------|------|
| 2.F.1.a<br>Commercial refrigeration    | Compound systems                     | R134a       | 24   | 32   | 39   | 25   | 41   | 161  |
|                                        |                                      | R404A       | 79   | 81   | 63   | 97   | 62   | 382  |
|                                        |                                      | R407C       | 20   | 12   | 10   | 3    | 18   | 63   |
|                                        |                                      | R449A       | 0    | 2    | 4    | 12   | 7    | 25   |
|                                        |                                      | R507A       | 8    | 16   | 3    | 7    | 1    | 35   |
|                                        | Plug-in units                        | R134a       | 13   | 10   | 3    | 4    | 11   | 41   |
| 2.F.1.c<br>Industrial refrigeration    | -                                    | R404A       | 6    | 15   | 19   | 12   | 18   | 70   |
|                                        |                                      | R134a       | 119  | 146  | 78   | 142  | 144  | 629  |
|                                        |                                      | R404A       | 22   | 19   | 16   | 28   | 18   | 103  |
|                                        |                                      | R407C       | 37   | 57   | 32   | 33   | 46   | 205  |
|                                        |                                      | R410A       | 4    | 9    | 4    | 6    | 5    | 28   |
| 2.F.1.f<br>Stationary air-conditioning | Decentral split units (single/multi) | R422D       | 9    | 1    | 2    | 4    | 9    | 25   |
|                                        |                                      | R134a       | 3    | 16   | 10   | 32   | 14   | 75   |
|                                        |                                      | R407C       | 126  | 165  | 137  | 103  | 77   | 608  |
|                                        | Decentral VRF/VRV units              | R410A       | 237  | 332  | 322  | 305  | 316  | 1512 |
|                                        |                                      | R407C       | 8    | 8    | 7    | 8    | 6    | 37   |
|                                        | Central air handling units           | R410A       | 11   | 26   | 24   | 30   | 33   | 124  |
|                                        |                                      | R407C       | 14   | 18   | 19   | 17   | 11   | 79   |
|                                        |                                      | R410A       | 11   | 11   | 9    | 14   | 9    | 54   |
|                                        | Unspecified central units            | R134a       | 7    | 16   | 13   | 55   | 34   | 125  |
|                                        |                                      | R407C       | 25   | 34   | 16   | 31   | 15   | 121  |
|                                        |                                      | R410A       | 26   | 13   | 15   | 17   | 13   | 84   |
|                                        | Heat pumps (direct evaporation)      | R410A       | 2    | 4    | 12   | 2    | 5    | 25   |
| Total                                  |                                      |             | 811  | 1043 | 857  | 987  | 913  | 4611 |

**Table S3.** Average initial charge of fluorinated refrigerants in decommissioned equipment in the VDKF-LEC database in kg.

| Sector                                    | Subsector                            | Refrigerant | 2017 | 2018 | 2019 | 2020               | 2021 | Total             |
|-------------------------------------------|--------------------------------------|-------------|------|------|------|--------------------|------|-------------------|
| 2.F.1.a<br>Commercial<br>refrigeration    | Compound systems                     | R134a       | 7.8  | 19.0 | 25.3 | 12.7               | 13.7 | 16.6              |
|                                           |                                      | R404A       | 35.0 | 43.0 | 46.6 | 44.1               | 36.0 | 41.0              |
|                                           |                                      | R407C       | 16.6 | 16.2 | 25.1 | 38.8               | 22.5 | 20.5              |
|                                           |                                      | R422D       | 9.8  | 21.9 | 15.1 | 16.9               | 7.7  | 14.5              |
|                                           |                                      | R449A       | -    | 17.5 | 76.6 | 32.9               | 29.9 | 37.0              |
|                                           |                                      | R507A       | 18.5 | 28.2 | 25.5 | 16.0               | 31.0 | 24.3              |
|                                           | Plug-in units                        | R134a       | 0.7  | 1.4  | 1.1  | 0.7                | 0.9  | 1.0               |
|                                           |                                      | R404A       | 3.0  | 1.2  | 1.5  | 2.2                | 1.5  | 1.7               |
| 2.F.1.c<br>Industrial<br>refrigeration    | -                                    | R134a       | 11.3 | 8.9  | 15.8 | 5.0                | 10.3 | 9.6               |
|                                           |                                      | R404A       | 17.6 | 19.1 | 11.8 | 119.7 <sup>1</sup> | 24.5 | 47.1 <sup>2</sup> |
|                                           |                                      | R407C       | 17.4 | 23.0 | 33.7 | 31.8               | 19.7 | 24.3              |
|                                           |                                      | R410A       | 16.7 | 2.5  | 7.4  | 4.1                | 2.1  | 5.5               |
|                                           |                                      | R422D       | 59.9 | 6.5  | 49.9 | 7.8                | 66.8 | 50.1              |
| 2.F.1.f<br>Stationary<br>air-conditioning | Decentral split units (single/multi) | R134a       | 0.7  | 0.8  | 0.8  | 0.9                | 0.8  | 0.8               |
|                                           |                                      | R407C       | 3.4  | 4.4  | 5.0  | 3.3                | 3.8  | 4.1               |
|                                           |                                      | R410A       | 2.9  | 2.5  | 2.9  | 2.6                | 2.4  | 2.6               |
|                                           | Decentral VRF/VRV units              | R407C       | 23.1 | 5.0  | 5.4  | 5.8                | 10.2 | 10.1              |
|                                           |                                      | R410A       | 15.9 | 11.6 | 13.1 | 10.2               | 11.5 | 12.0              |
|                                           | Unspecified decentral units          | R407C       | 2.0  | 1.7  | 1.2  | 1.5                | 1.2  | 1.6               |
|                                           |                                      | R410A       | 2.1  | 1.5  | 1.4  | 2.0                | 1.0  | 1.6               |
|                                           | Central air handling units           | R407C       | 27.1 | 12.4 | 39.8 | 12.7               | 30.0 | 24.0              |
|                                           |                                      | R410A       | 12.8 | 2.6  | 3.6  | 2.6                | 2.5  | 4.9               |
|                                           | Unspecified central units            | R134a       | 1.7  | 15.6 | 46.2 | 3.0                | 4.5  | 9.7               |
|                                           |                                      | R407C       | 12.1 | 9.6  | 18.2 | 8.9                | 21.1 | 12.5              |
|                                           |                                      | R410A       | 5.7  | 8.6  | 3.4  | 2.4                | 2.3  | 4.5               |
|                                           | Heat pumps (direct evaporation)      | R410A       | 14.3 | 18.9 | 6.2  | 6.0                | 19.9 | 11.8              |

<sup>1</sup> Excluding one single unit with 1800 kg charge, the average is 61.7 kg.<sup>2</sup> Excluding one single unit with 1800 kg charge, the total average is 30.4 kg.

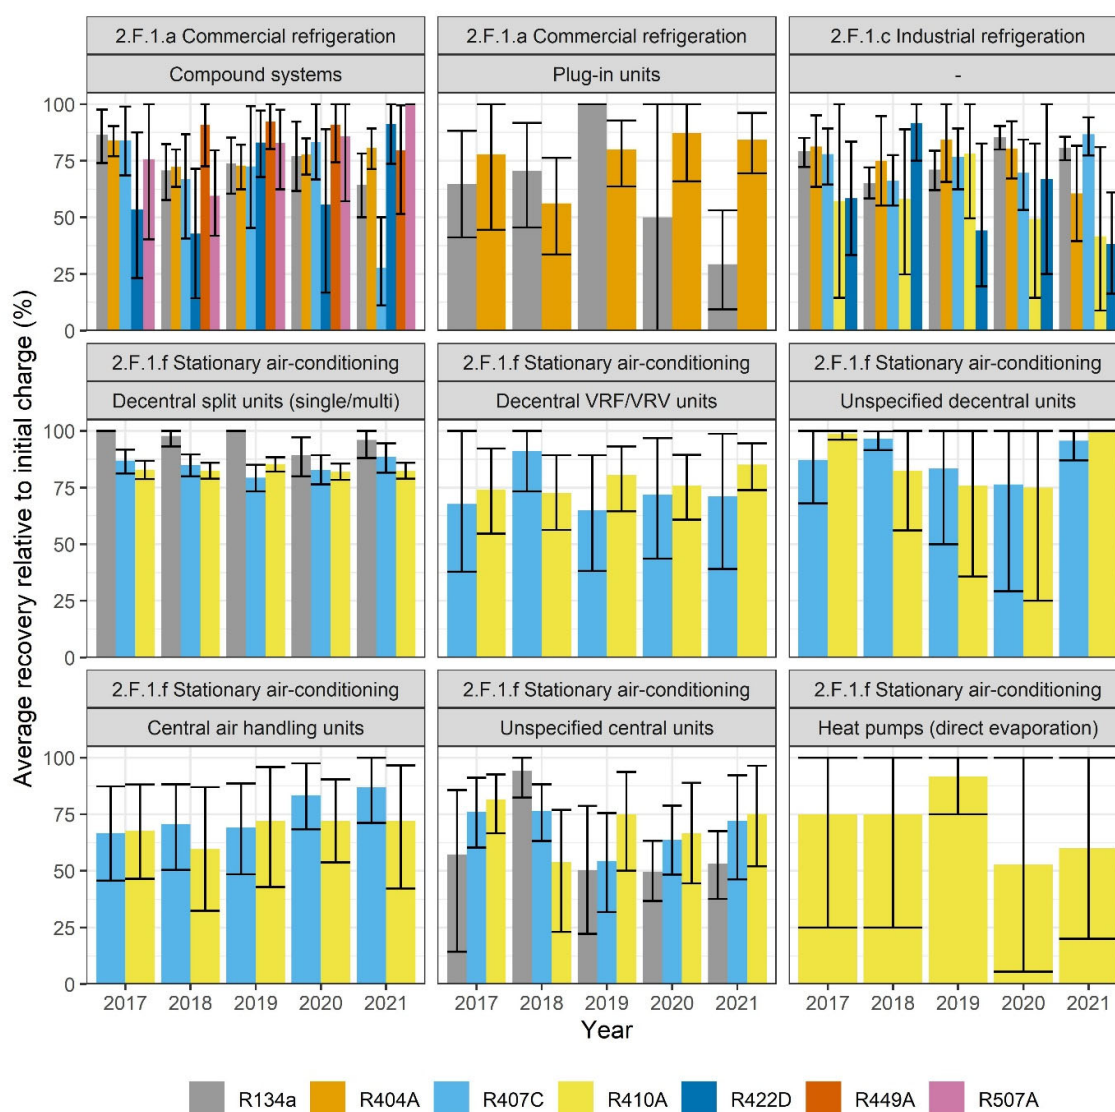

**Figure S1.** Average recovery of fluorinated refrigerant from decommissioned equipment relative to the initial charge for the different sectors and subsectors by type of refrigerant in the VDKF-LEC database. Error bars are nonparametric bootstrapped 95 % confidence intervals for the group mean, based on 1000 bootstrap resamples.

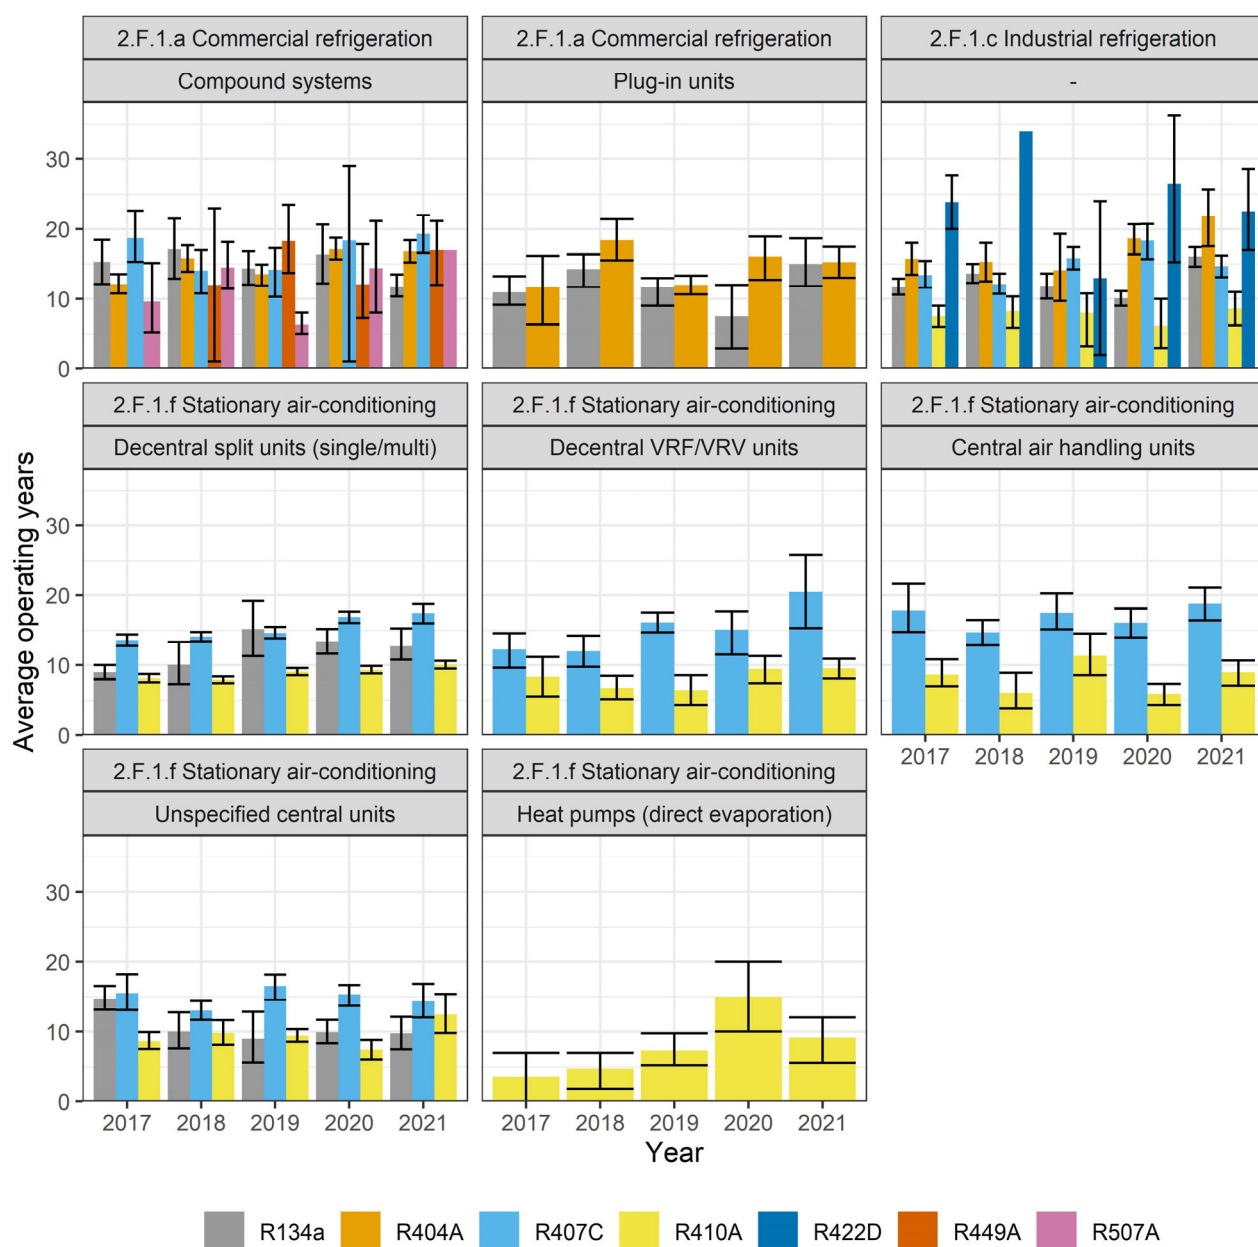

**Figure S2.** Average operating years of decommissioned equipment by sector, subsector, and refrigerant in the VDKF-LEC database. Error bars are nonparametric bootstrapped 95 % confidence intervals for the group mean, based on 1000 bootstrap resamples.
